# Supplementary material
Source: PubMed Central journal article supplement (PMC7322041)
Supplement: pnas.1922525117.sapp.pdf [file pnas.1922525117.sapp.pdf]

# SI Appendix Figure S1

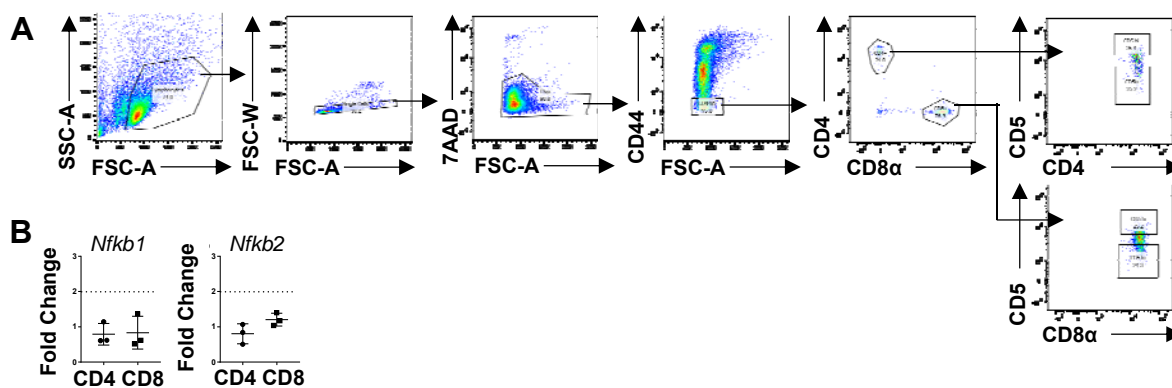

**C**

| CD4:CD5lo vs hi  | baseMean | log2FoldChange | lfcSE | stat   | pvalue      | padj        |
|------------------|----------|----------------|-------|--------|-------------|-------------|
| <i>Cd5</i>       | 46521.99 | -2.41          | 0.07  | -32.19 | 2.45E-227   | 1.84E-223   |
| <i>Nfkb1</i>     | 23416.20 | -0.15          | 0.06  | -2.37  | 0.017884996 | 0.218935017 |
| <i>Nfkb1a</i>    | 26346.78 | 0.06           | 0.21  | 0.27   | 0.783588692 | 1           |
| <i>Rela</i>      | 12974.57 | 0.05           | 0.15  | 0.31   | 0.760287785 | 1           |
| <i>Nfkb1b</i>    | 3753.16  | 0.05           | 0.06  | 0.87   | 0.383883222 | 0.955049738 |
| <i>Ikbbk</i>     | 27088.15 | 0.07           | 0.08  | 0.88   | 0.380134906 | 0.951405574 |
| <i>Chuk</i>      | 6020.10  | 0.00           | 0.13  | 0.04   | 0.970329382 | 1           |
| <i>Nfkb2</i>     | 8815.96  | 0.16           | 0.17  | 0.98   | 0.328588202 | 0.930298216 |
| <i>Relb</i>      | 5202.47  | -0.08          | 0.13  | 0.60   | 0.546680546 | 0.999464978 |
| CD8: CD5lo vs hi | baseMean | log2FoldChange | lfcSE | stat   | pvalue      | padj        |
| <i>Cd5</i>       | 46521.99 | -1.30          | 0.07  | -17.35 | 2.00E-67    | 1.47E-63    |
| <i>Nfkb1</i>     | 23416.20 | -0.06          | 0.06  | 0.95   | 0.340057601 | 0.652899859 |
| <i>Nfkb1b</i>    | 3753.16  | 0.02           | 0.06  | 0.31   | 0.756061527 | 0.911582885 |
| <i>Nfkb1a</i>    | 26346.78 | 0.27           | 0.21  | 1.30   | 0.194513475 | 0.492214303 |
| <i>Rela</i>      | 12974.57 | 0.17           | 0.15  | 1.09   | 0.276705834 | 0.592229245 |
| <i>Ikbbk</i>     | 27088.15 | 0.18           | 0.08  | 2.19   | 0.028471523 | 0.151758882 |
| <i>Chuk</i>      | 6020.10  | 0.04           | 0.13  | 0.29   | 0.774605829 | 0.921294884 |
| <i>Nfkb2</i>     | 8815.96  | 0.08           | 0.16  | 0.47   | 0.635654019 | 0.851817538 |
| <i>Relb</i>      | 5202.47  | -0.08          | 0.13  | 0.58   | 0.559642441 | 0.808232267 |

# SI Appendix Figure S2

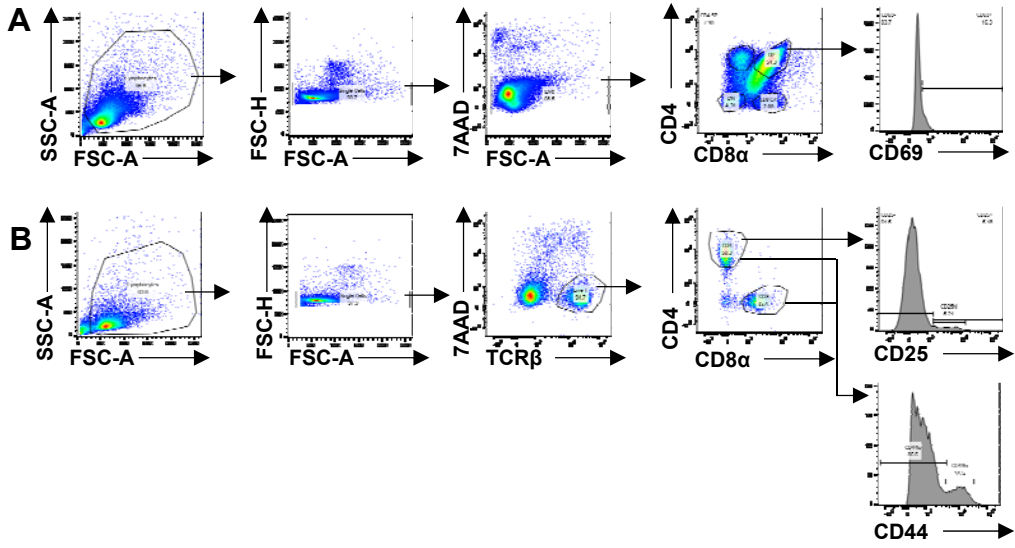

# SI Appendix Figure S3

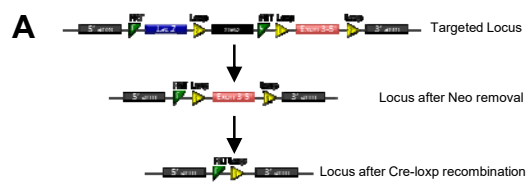

# SI Appendix Figure S4

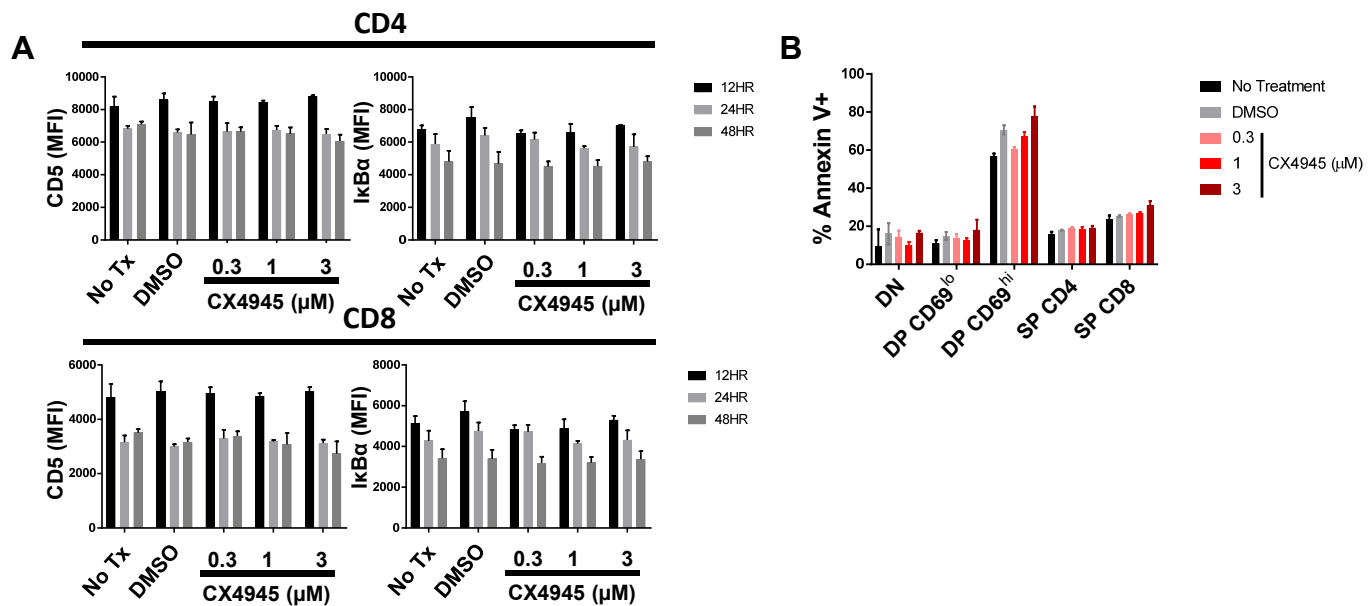

# SI Appendix Figure S5

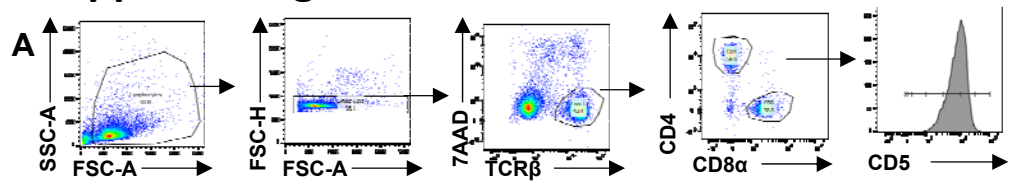



# SI Appendix Figure S7

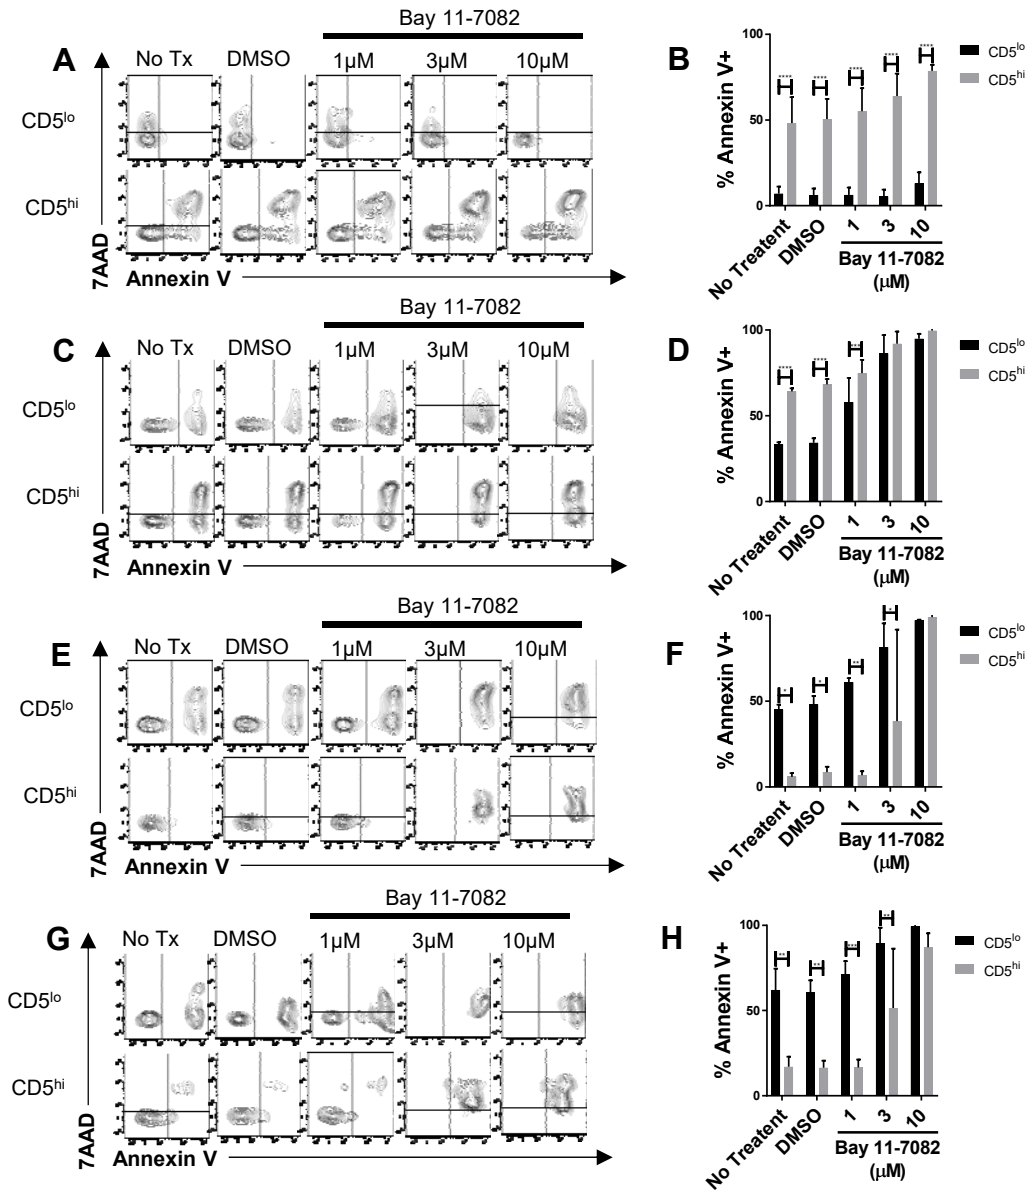

1. SI Appendix Figure S1. Sort gating strategy for western blot or qPCR analysis.
  - A. Wild-type B6 lymph nodes and splenocytes were homogenized into a single cell suspension. Cells were blocked and stained with anti-CD4, anti-CD8, anti-CD44, anti-CD5, and 7AAD. Cells were sorted using the strategy depicted and then analyzed via western blot or used to harvest RNA for qPCR analysis.
  - B. RT-qPCR analysis of sorted CD5<sup>hi</sup> and CD5<sup>lo</sup> CD4 and CD8 T cells as collected by gates shown in A.
  - C. Tables of RNA-Seq analysis of of NFκB pathway genes in sorted CD5<sup>hi</sup> and CD5<sup>lo</sup> subsets of CD4 and CD8 T cells.
  
2. SI Appendix Figure S2. Gating strategy for flow cytometric analysis of thymocytes and peripheral T cells.
  - A. Gating strategy for thymocyte analysis.
  - B. Gating strategy for peripheral T cell analysis.
  
3. SI Appendix Figure S3. Schematic of CD5-floxed mice with the CAG-CreERT2 transgene.
  - A. Diagram showing the excision of CD5 gene before and after tamoxifen administration.
  
4. SI Appendix Figure S4. Casein kinase 2 inhibition does not impact expression of CD5 or IκBα and does not impact thymocyte survival.
  - A. Pooled lymph node and spleens were homogenized into a single cell suspension and cultured ex vivo with varying concentrations of CX4945 and harvested at the indicated time points. Cells were analyzed for expression of CD5 and IκBα within CD4 and CD8 T cell populations (n = 3 from 1 independent experiment).



- B. Thymocytes were cultured ex vivo for 15 hours with varying concentrations of CX4945. The frequency of Annexin V<sup>+</sup> cells within each population is shown (n = 3 from 1 independent experiment).
5. SI Appendix Figure S5. Binning strategy for WT and CD5-Tg analysis.
- A. Binning strategy for wild-type and CD5 transgenic (CD5-Tg) analysis as displayed in Figure 4G. Bins for CD5 expression were based on the following gMFI values : 0 – 100 (Bin 1), 100 – 300 (Bin 2), 300 – 1000 (Bin 3), 1000 – 3000 (Bin 4), 3000 – 10000 (Bin 5), 10000 – 30000 (Bin6), 30000 – 100000 (Bin 7).
6. SI Appendix Figure S6. Amnis ImageStream analysis and western blot analysis of NFκB localization in resting peripheral T cells
- A. Western blot analysis of sorted CD4 and CD8 B6 lymphocytes gated on 20% CD5<sup>hi</sup> and CD5<sup>lo</sup>. Cells were fractionated into cytoplasmic and nuclear fractions and probed for PLCγ1 (cytoplasmic normalization), SP1 (nuclear normalization), and NFκB p65. (n = 1 from 1 independent experiment)
- B. Percentage, median pixel values, and gMFI values of nuclear and cytoplasmic NFκB p65 in resting peripheral T cells. (n = 5 from 1 independent experiment)

Significance is indicated as follows: p<0.05 = \* ; p<0.01 = II ; p<0.001 = \*\*\* ; p<0.0001 = \*\*\*\*. Anything not marked is not statistically significant.

7. SI Appendix Figure S7. Inhibition of NFκB ablates the survival advantage of CD5<sup>hi</sup> cells
- A. Thymocytes from B6 mice were cultured ex vivo for 15 hours with or without varying Bay11-7082 doses. Cells were stained and gated as in Supplementary Figure 2, together with Annexin V and 7AAD to assess cell

death. Representative flow plots are shown for the double-negative population.

- B. The frequencies of Annexin V<sup>+</sup> cells within the top and bottom 20% of CD5 expressers of the double-negative population are shown (n = 3 from 1 independent experiment).
- C. Thymocytes from B6 mice were cultured ex vivo for 15 hours with or without varying Bay11-7082 doses. Cells were stained and gated as in Supplementary Figure 2, together with Annexin V and 7AAD to assess cell death. Representative flow plots are shown for the double-positive CD69<sup>lo</sup> population.
- D. The frequencies of Annexin V<sup>+</sup> cells within the top and bottom 20% of CD5 expressers of the double-positive CD69<sup>lo</sup> population are shown (n = 3 from 1 independent experiment).
- E. Thymocytes from B6 mice were cultured ex vivo for 15 hours with or without varying Bay11-7082 doses. Cells were stained and gated as in Supplementary Figure 2, together with Annexin V and 7AAD to assess cell death. Representative flow plots are shown for the single-positive CD4 population.
- F. The frequencies of Annexin V<sup>+</sup> cells within the top and bottom 20% of CD5 expressers of the single-positive CD4 population are shown (n = 3 from 1 independent experiment).
- G. Thymocytes from B6 mice were cultured ex vivo for 15 hours with or without varying Bay11-7082 doses. Cells were stained and gated as in Supplementary Figure 2, together with Annexin V and 7AAD to assess cell death. Representative flow plots are shown for the single-positive CD8 population.
- H. The frequencies of Annexin V<sup>+</sup> cells within the top and bottom 20% of CD5 expressers of the single-positive CD8 population are shown (n = 3 from 1 independent experiment).

Table 1. Antibodies used for flow cytometry staining.

| <b>Antibody</b> | <b>Fluorochrome</b> | <b>Manufacturer</b> | <b>Catalog #</b> | <b>Clone</b> |
|-----------------|---------------------|---------------------|------------------|--------------|
| B220            | APC-Cy7             | Biologend           | 103224           | RA3.6B2      |
| B220            | PE                  | BD Pharmingen       | 553090           | RA3-6B2      |
| CD11b           | APC                 | eBioscience         | 17-0112-83       | M1/70        |
| CD11b           | PE                  | eBioscience         | 12-0112-81       | M1/70        |
| CD11c           | APC                 | Biologend           | 117309           | N418         |
| CD11c           | PE                  | eBioscience         | 12-0114-83       | N418         |
| CD127           | APC                 | eBioscience         | 17-1271-82       | A7R34        |
| CD19            | APC                 | eBioscience         | 17-0193-82       | eBio1D3      |
| CD25            | BV650               | Biologend           | 102037           | PC61         |
| CD25            | APC-Cy7             | BD Pharmingen       | 557658           | PC61         |
| CD4             | BV605               | Biologend           | 100451           | GK1.5        |
| CD4             | APC-Cy7             | BD Pharmingen       | 552051           | GK1.5        |
| CD4             | PE                  | BD Pharmingen       | 553730           | GK1.5        |
| CD4             | PE                  | eBioscience         | 12-0042-83       | RM4-5        |
| CD44            | FITC                | Biologend           | 103006           | IM7          |
| CD45.1          | FITC                | Biologend           | 110706           | A20          |
| CD45.1          | APC-Cy7             | Biologend           | 110716           | A20          |
| CD45.1          | APC                 | Biologend           | 110714           | A20          |
| CD45.2          | PE-Cy5.5            | Invitrogen          | 35-0454-82       | 104          |
| CD5             | eFluro450           | eBioscience         | 48-0051-82       | 53-7.3       |
| CD5             | PE-Cy7              | eBioscience         | 25-0051-81       | 53-7.3       |
| CD62L           | PE-Cy7              | Biologend           | 104418           | MEL-14       |
| CD69            | PerCP-Cy5.5         | BD Pharmingen       | 551113           | H1.2F3       |
| CD69            | FITC                | BD Pharmingen       | 553236           | H1.2F3       |
| CD69            | eFluor450           | eBioscience         | 48-0691-82       | H1.2F3       |
| CD8 $\alpha$    | APC-Cy7             | BD Pharmingen       | 557654           | 53-6.7       |
| CD8 $\alpha$    | FITC                | Biologend           | 100706           | 53-6.7       |
| CD8 $\alpha$    | PerCP-Cy5.5         | BD Pharmingen       | 551162           | 53-6.7       |
| CD8 $\alpha$    | FITC                | eBioscience         | 11-0081-85       | 56-6.7       |
| CD8 $\alpha$    | APC-eFluro780       | eBioscience         | 47-0081-82       | 53-6.7       |
| CD8 $\alpha$    | BV650               | BD OptiBuild        | 740552           | H35-17.2     |
| CD8 $\alpha$    | BB515               | BD Pharmingen       | 564422           | 53-6.7       |

|                       |        |               |            |                 |
|-----------------------|--------|---------------|------------|-----------------|
| CD8 $\alpha$          | APC    | eBioscience   | 17-0081-81 | 53-6.7          |
| CD8 $\alpha$          | PE-Cy7 | eBioscience   | 25-0081-81 | 53-6.7          |
| I $\kappa$ B $\alpha$ | PE     | Invitrogen    | 12-9036-41 | MFRDTRK         |
| I $\kappa$ B $\alpha$ | APC    | Invitrogen    | 17-9036-42 | MFRDTRK         |
| LAT                   | APC    | eBioscience   | 17-9967-42 | LAT.10-17       |
| NF $\kappa$ B p65     | AF647  | CST           | 8801S      | D14E12          |
| NK1.1                 | APC    | eBioscience   | 17-5941-82 | PK136           |
| NK1.1                 | PE     | Biolegend     | 108708     | PK136           |
| PLC $\gamma$          | PE     | BD Phosflow   | 558575     | 10/PLC $\gamma$ |
| TCR $\beta$           | PE-Cy7 | Biolegend     | 109222     | H57-597         |
| TCR $\beta$           | FITC   | BD Pharmingen | 553171     | H57-597         |
| V $\beta$ 3           | PE     | BD Pharmingen | 553209     | KJ25            |
| Zap70                 | FITC   | eBioscience   | 11-6695-82 | 1E7.2           |
